# Supplementary material for: A high capacity MnFe2O4/rGO nanocomposite for Li and Na-ion battery applications
Source: Royal Society of Chemistry journal article supplement (doi:10.1039/c5ra11439j), 2015-01-01
Supplement: c5ra11439j1.pdf [file c5ra11439j1.pdf]

## Supplementary information

# High capacity $\text{MnFe}_2\text{O}_4/\text{rGO}$ composite for Li and Na-ion battery applications

Pratap Kollu <sup>\*a</sup>, Ramesh Kumar Petla <sup>b</sup>, Chella Santosh <sup>c</sup>, Do Kyung Kim <sup>\*b</sup> and Andrews Nirmala Grace <sup>\*c</sup>

<sup>a</sup> Thin Film Magnetism group, Cavendish Laboratory, Department of Physics, University of Cambridge, Cambridge CB3 0HE, United Kingdom.

<sup>b</sup> Department of Materials Science and Engineering, Korea Advanced Institute of Science and Technology (KAIST), Daejeon 305-701, Republic of Korea

<sup>c</sup> Centre for Nanotechnology Research, VIT University, Vellore- 632014, Indi

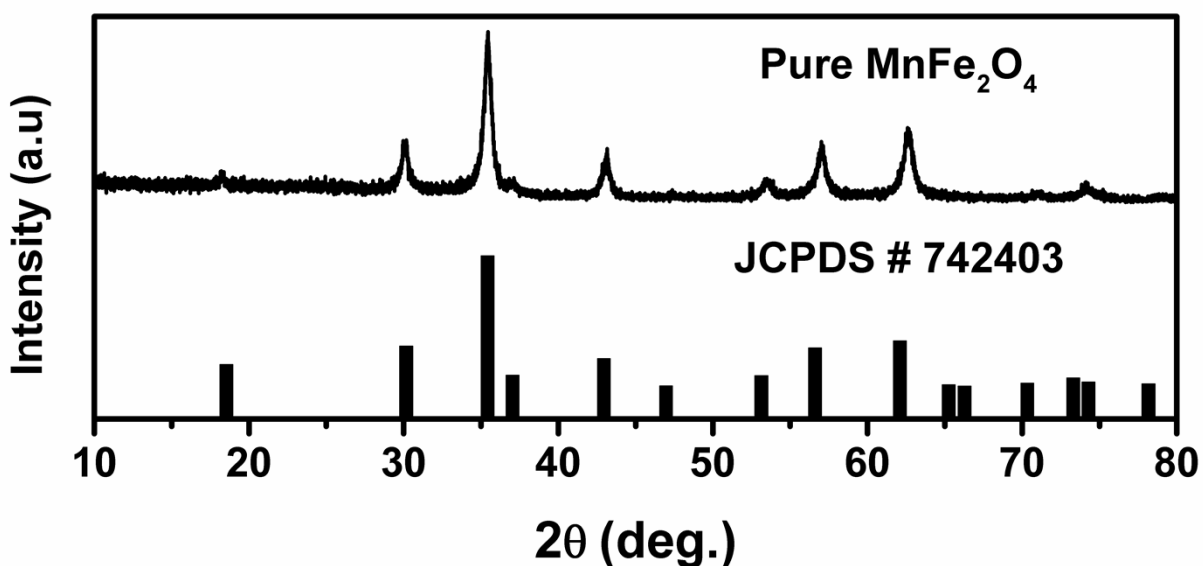

Figure S1: XRD patterns for the pure  $\text{MnFe}_2\text{O}_4$  along with JCPDS data.

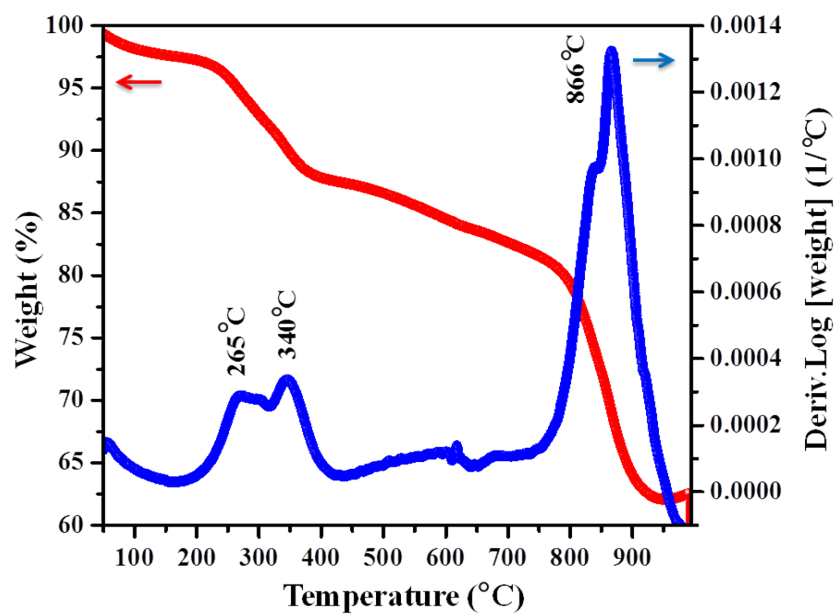

Figure S2: TGA/DSC plots for the MnFe<sub>2</sub>O<sub>4</sub>/rGO composite in air atmosphere.

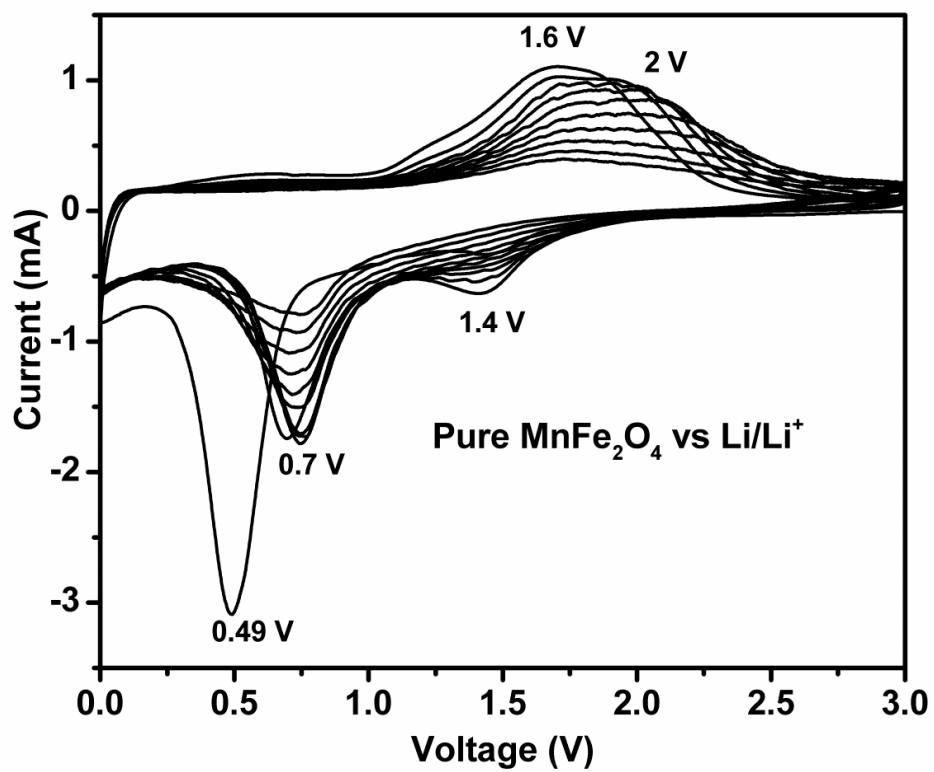

Figure S3: Cyclic voltammety plots for the pure  $\text{MnFe}_2\text{O}_4$  Vs.  $\text{Li/Li}^+$ .

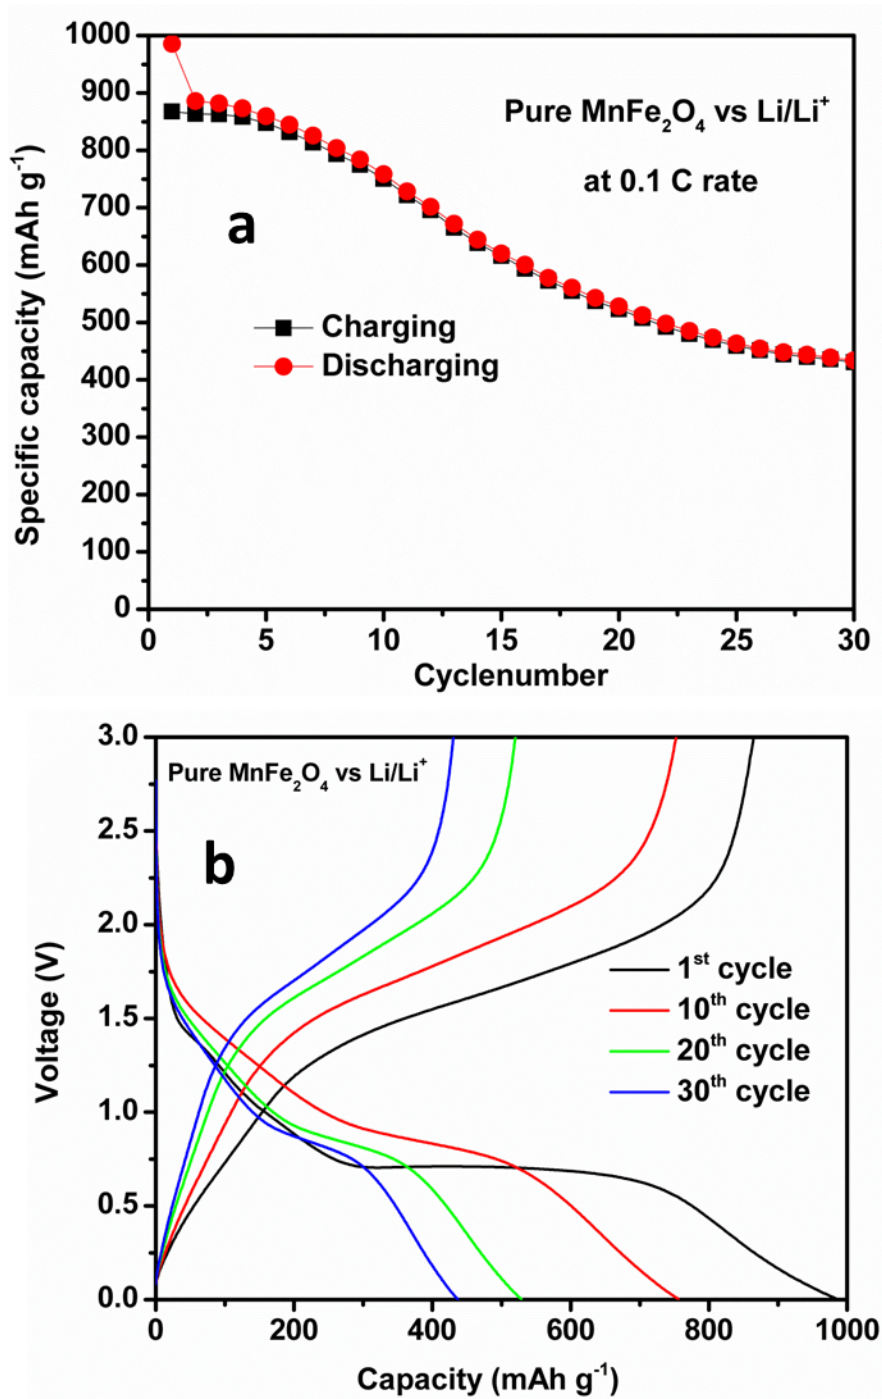

Figure S4: a) cycleability and b) charge-discharge curves for the pure  $\text{MnFe}_2\text{O}_4$  vs  $\text{Li/Li}^+$

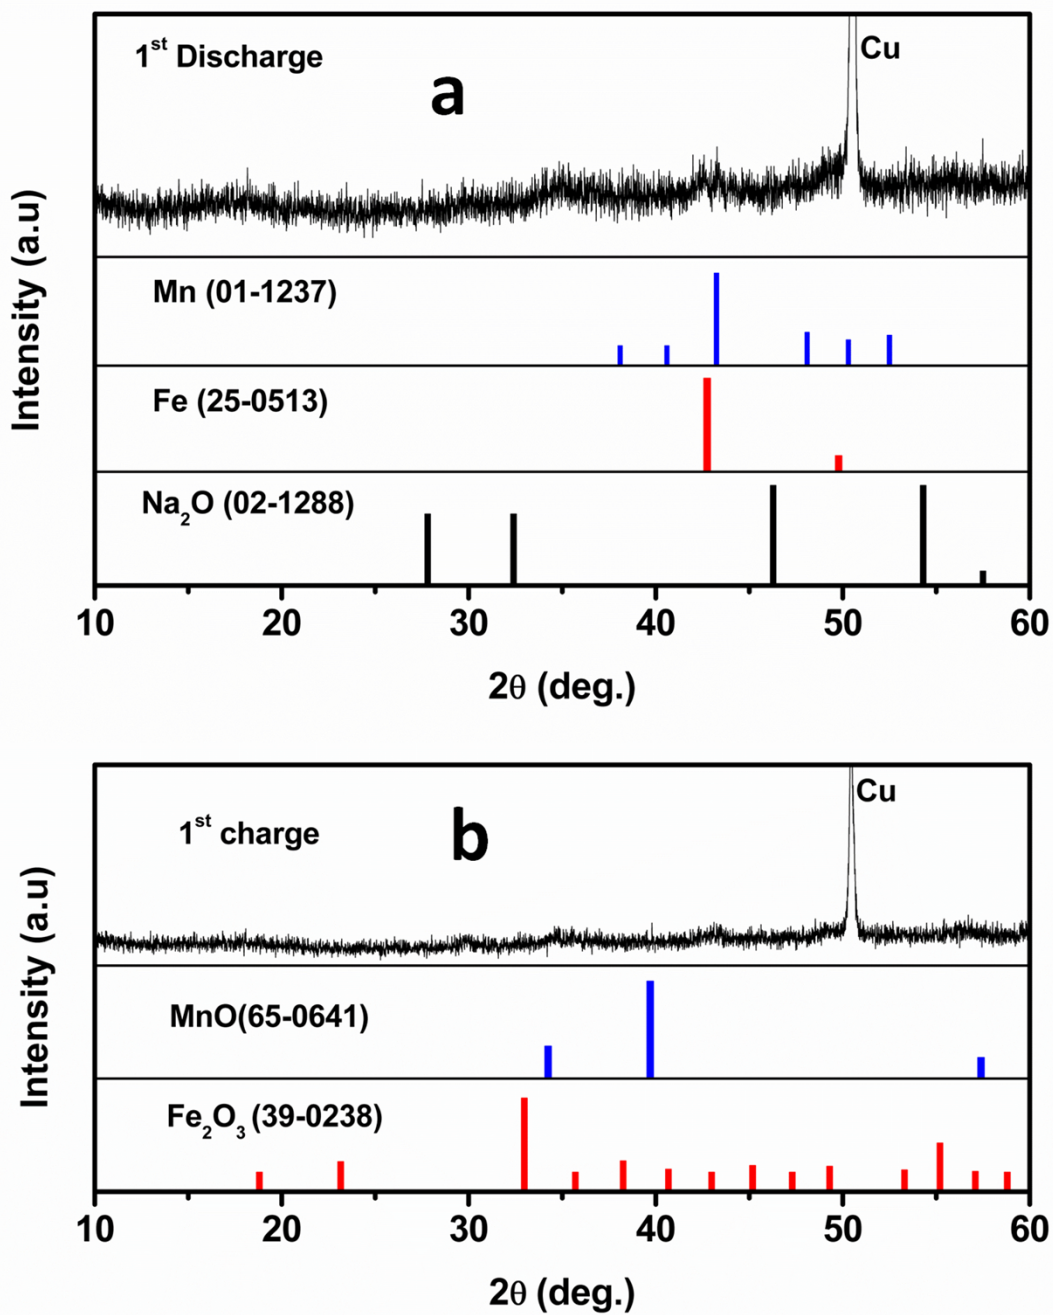

Figure S5: XRD patterns for the MnFe<sub>2</sub>O<sub>4</sub>/rGO electrodes versus Na/Na<sup>+</sup> at a) 1<sup>st</sup> discharge and b) 1<sup>st</sup> charge states along with existence compound JCPDS data.
